# Supplementary material
Source: HighWire-hosted journal article supplement (https://bmjopen.bmj.com/content/7/3/e014293)
Supplement: inline-supplementary-material-1 [file inline-supplementary-material-1.pdf]

Supplemental Table 1: Crude and adjusted estimates of effect of intimate partner violence and alcohol use on SGA and preterm births. (exposures measured during third trimester)

|                                         | No of pregnancy | No of SGA | Small for gestational age |                       | No of preterm | Preterm birth       |                       |
|-----------------------------------------|-----------------|-----------|---------------------------|-----------------------|---------------|---------------------|-----------------------|
|                                         |                 |           | Risk Ratio [95% CI]       |                       |               | Risk Ratio [95% CI] |                       |
|                                         |                 |           | crude                     | Adjusted <sup>1</sup> |               | Crude               | Adjusted <sup>1</sup> |
| <b><u>Intimate partner violence</u></b> |                 |           |                           |                       |               |                     |                       |
| No violence                             | 531             | 63        | 1.00 [Reference]          | 1.00 [Reference]      | 70            | 1.00 [Reference]    | 1.00 [Reference]      |
| Physical                                | 21              | 1         | 0.39 [0.05, 2.93]         | 0.39 [0.05, 3.30]     | 2             | 0.69 [0.16, 3.03]   | 0.72 [0.15, 3.31]     |
| Sexual                                  | 1               | 0         | --*                       | --*                   | 0             | --*                 | --*                   |
| Psychological                           | 27              | 2         | 0.59 [0.14, 2.54]         | 0.58 [0.12, 2.75]     | 2             | 0.52 [0.12, 2.24]   | 0.49 [0.11, 2.24]     |
| <b><u>Alcohol use</u></b>               |                 |           |                           |                       |               |                     |                       |
| Low                                     | 517             | 57        | 1.00 [Reference]          | 1.00 [Reference]      | 67            | 1.00 [Reference]    | 1.00 [Reference]      |
| Hazardous drinking in women             | 54              | 9         | 1.55 [0.72, 3.33]         | 1.62 [0.68, 3.84]     | 8             | 1.16 [0.52, 2.57]   | 1.13 [0.48, 2.65]     |
